# Supplementary material for: Oxford Nanopore MinION Direct RNA-Seq for Systems Biology
Source: MDPI journal article supplement (doi:10.3390/biology10111131), 2021-11-04
Supplement: s1 [file s1]

## HCT116 cell line

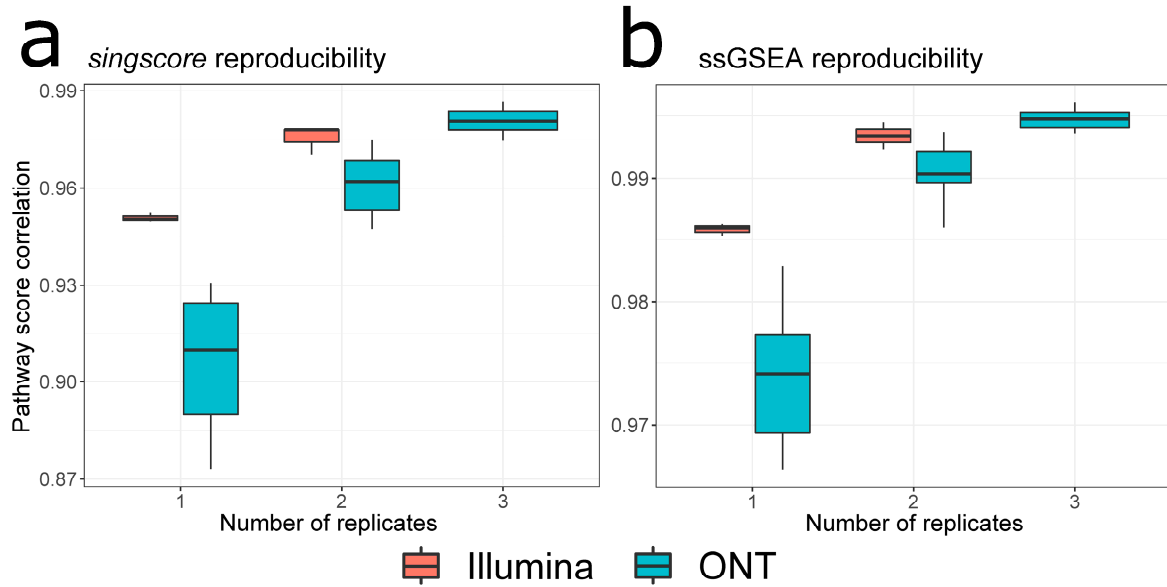

**Figure S1.** Pairwise Spearman correlation between pathway scores for different combinations of experimental replicates using published data for HCT 116 cell line.
